# Supplementary material
Source: Springer Nature journal article supplement (https://www.springermedizin.de/resource/supplementary/12943_2009_644_MOESM2_ESM.pdf/9554472)

# A

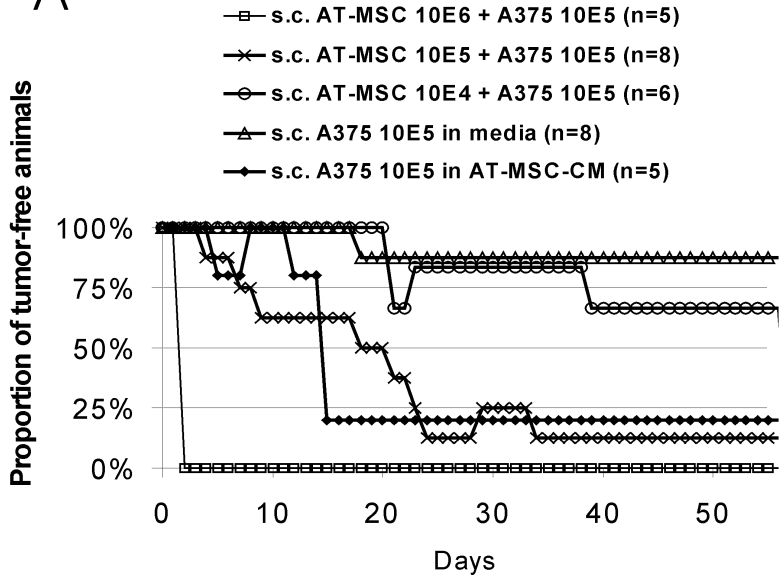

| Treatment                    | Incidence | P value* |
|------------------------------|-----------|----------|
| s.c. A375 10E5 in media      | 1/8       |          |
| s.c. AT-MSC 10E6 + A375 10E5 | 5/5       | 0,00023  |
| s.c. AT-MSC 10E5 + A375 10E5 | 7/8       | 0,00317  |
| s.c. AT-MSC 10E4 + A375 10E5 | 2/6       | 0,419    |
| s.c. A375 10E5 in AT-MSC-CM  | 3/5       | 0,00763  |

# B

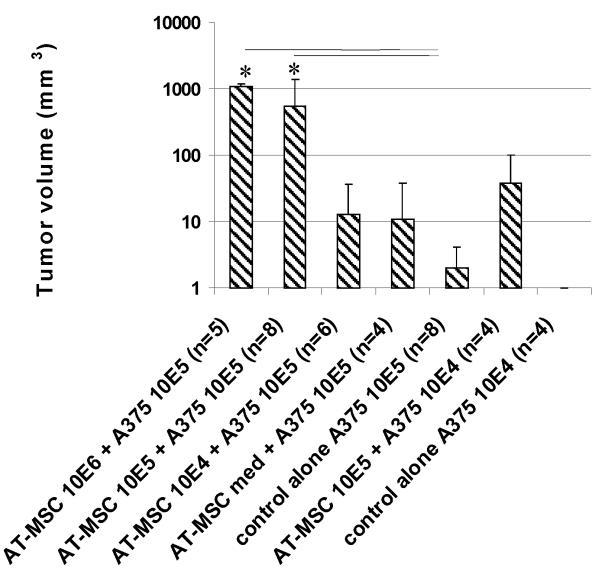

# C

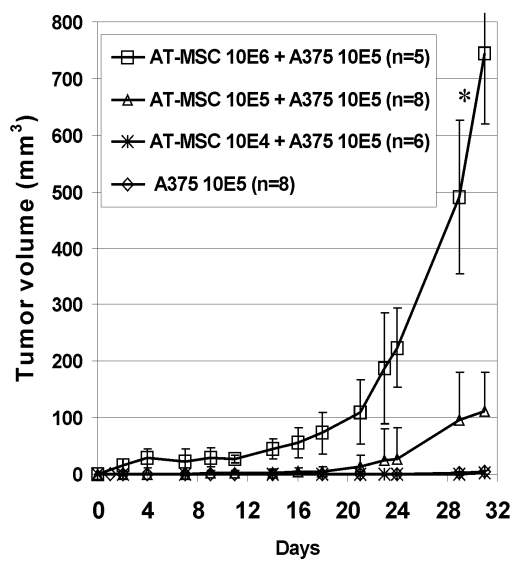

Supplement: MOESM2 [file 9554472]
